# Supplementary material for: Structural and biochemical insights into the inhibition of Mycobacterium tuberculosis cyclic dinucleotide phosphodiesterase by a sulfur-modified cyclic dinucleotide analog
Source: Royal Society of Chemistry journal article supplement (doi:10.1039/d6cb00006a), 2026-04-14
Supplement: d6cb00006a2.pdf [file d6cb00006a2.pdf]

## Supplementary Information

### **Structural and biochemical insights into the inhibition of *Mycobacterium tuberculosis* Cyclic Dinucleotide Phosphodiesterase by a sulfur-modified cyclic dinucleotide analog**

Dagur Singh Hanuman<sup>1,§</sup>, Singh Neeharika<sup>1,§</sup>, Sinha Krishna Murari<sup>2</sup>, Simpa K. Yeboah<sup>3</sup>, Herman O. Sintim<sup>#,3,4</sup>, and Eerappa Rajakumara<sup>1,\*</sup>

<sup>1</sup>Macromolecular Structural Biology Laboratory, Department of Biotechnology, Indian Institute of Technology Hyderabad (IITH), Hyderabad, Telangana, India- 502285

<sup>2</sup>Amity Institute of Biotechnology, Amity University Haryana, Haryana, India

<sup>3</sup>James Tarpo Jr. and Margaret Tarpo Department of Chemistry, 560 Oval Drive, West Lafayette, IN 47907, USA.

<sup>4</sup>Department of Chemistry and Biochemistry, University of Notre Dame, 305A McCourtney Hall, Notre Dame, IN 46556, USA.

<sup>§</sup>Equally contributed

\*Corresponding author: Eerappa Rajakumara; Email: [eraj@bt.iith.ac.in](mailto:eraj@bt.iith.ac.in)

#Co-corresponding author: Herman O. Sintim, Email: [hsintim@nd.edu](mailto:hsintim@nd.edu)

## Supplementary Figures

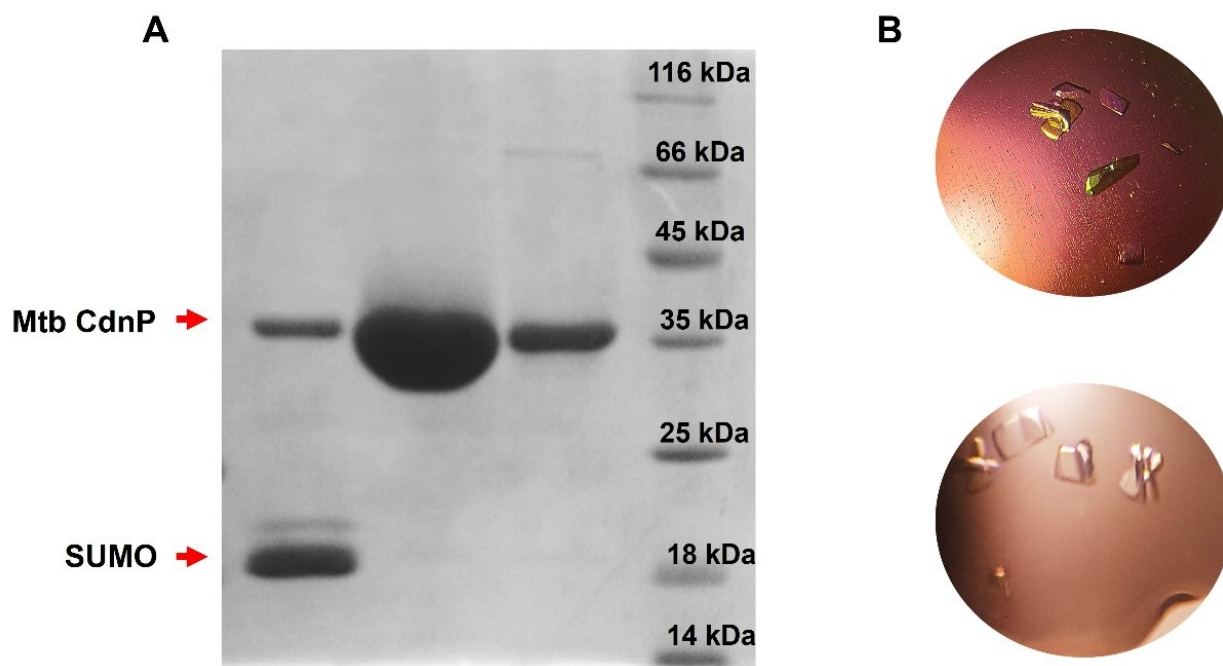

**Figure S1. Purification and crystallization of *M. tuberculosis* CdnP.** (A) SDS-PAGE analysis of gel filtration-purified recombinant CdnP. (B) Crystal of the CdnP-ES-2'3'-cAAMP complex grown at 20 °C.

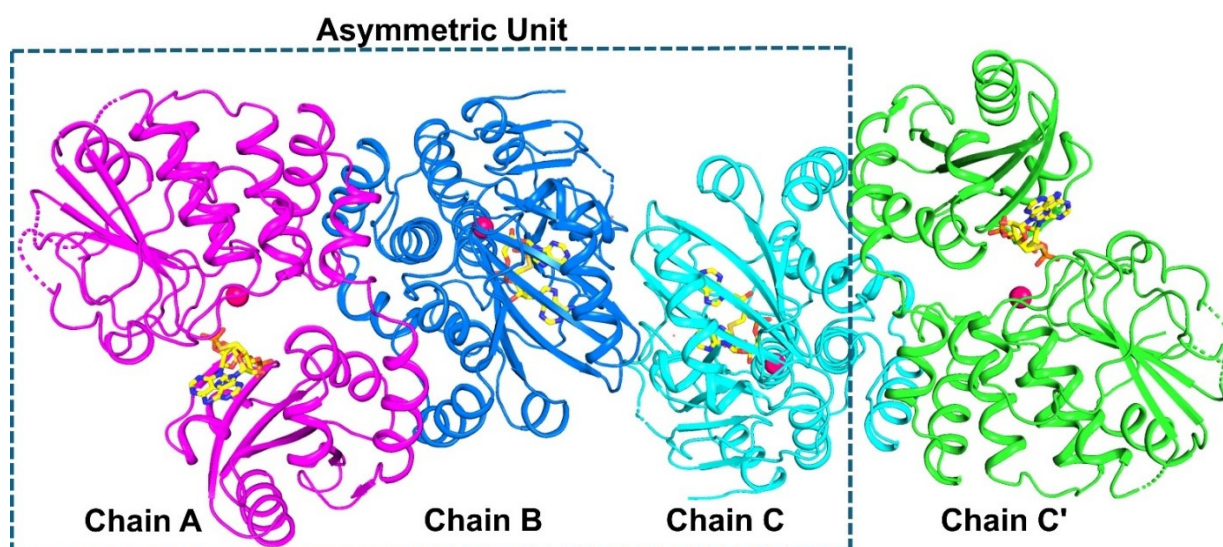

**Figure S2. Biological assembly of CdnP.** The functional dimer of CdnP is formed in two distinct ways: one dimer is assembled from two protomers (chains A and B) within the

asymmetric unit, while a second dimer is formed by chain C and its crystallographic symmetry mate (chain C').

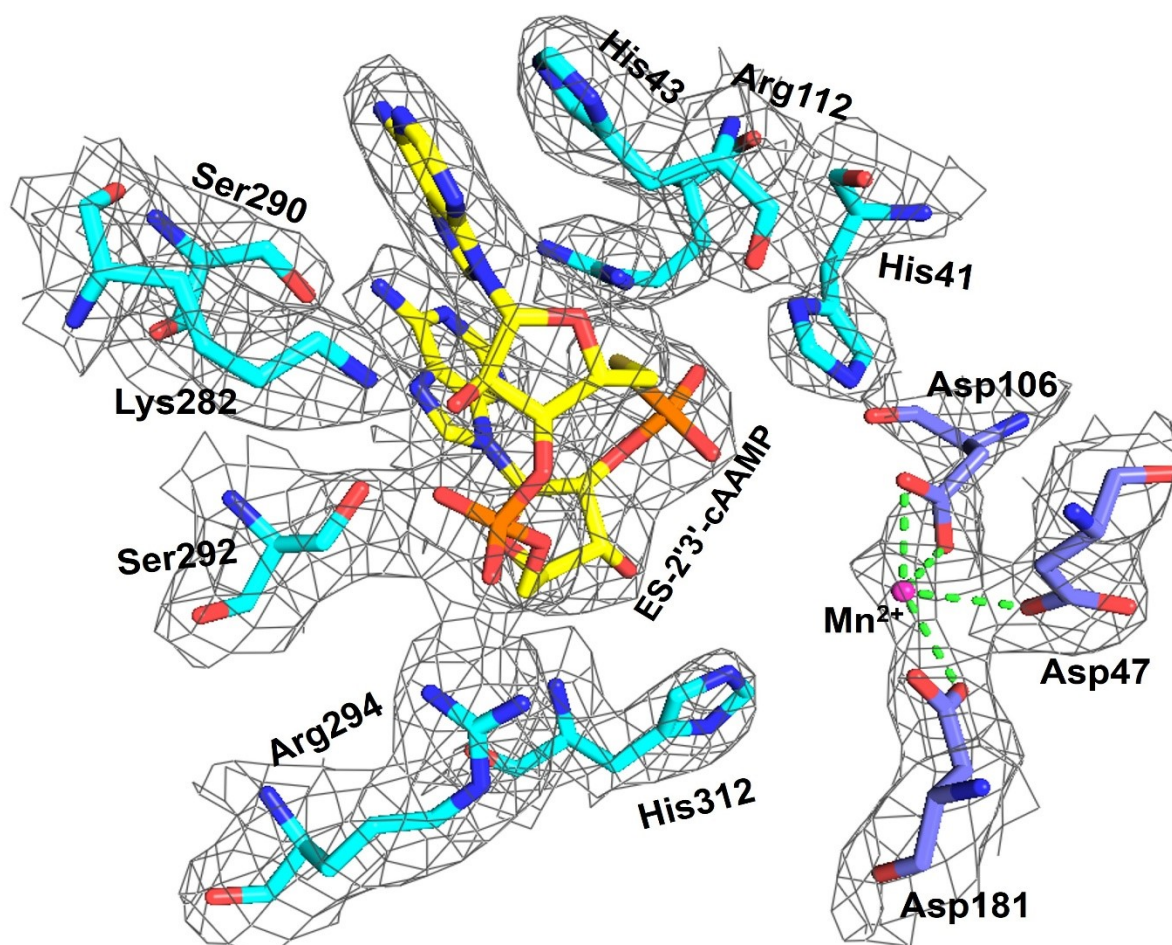

**Figure S3. Electron density map of the Mn<sup>2+</sup> ion and active-site residues.** The 2Fo-Fc electron density map (grey mesh, contoured at 1.0  $\sigma$ ) is shown around the Mn<sup>2+</sup> ion, catalytic Asp residue, and ES-2'3'-cAAMP-interacting residues corresponding to those shown in Fig. 5. The Mn<sup>2+</sup>-coordinating residues are shown as light blue sticks, ES-2'3'-cAAMP-interacting residues as cyan sticks, and ES-2'3'-cAAMP as yellow sticks. Mn<sup>2+</sup> coordination is indicated by green dashed lines. The stacking interaction is omitted for clarity.

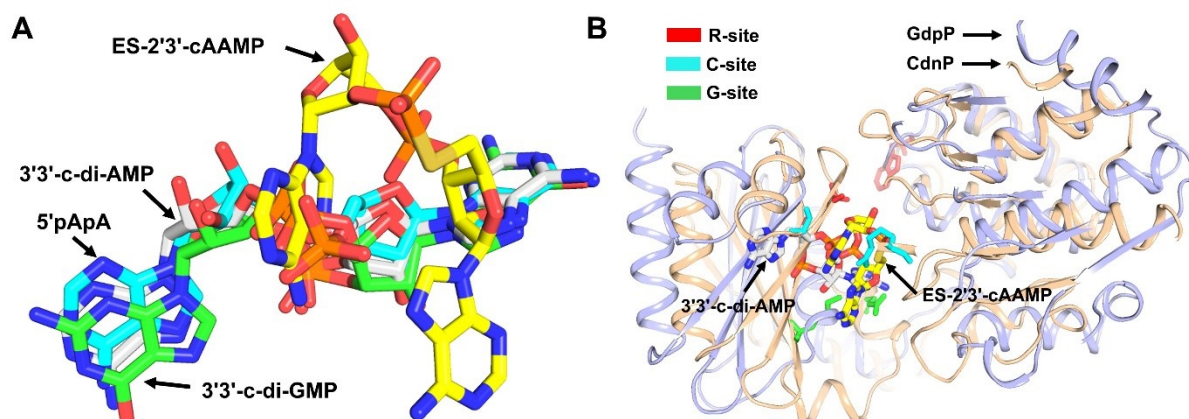

**Figure S4. Distinct CDN Binding Conformations and Site Preferences in CdnP and GdpP.**

(A) The ES-2'3'-cAAMP bound to CdnP was superimposed with CDNs bound to GdpP. The 3'3'-c-di-AMP (PDB ID: 5XSN), 3'3'-c-di-GMP (PDB ID: 5XT3) and 5'pApA (PDB ID: 5XSP) exist in the extended conformations, while the ES-2'3'-cAAMP has a horseshoe-shape conformation. (B) 3'3'-c-di-AMP binds to GdpP at the GC site, whereas in CdnP it occupies the RC site. In contrast, ES-2'3'-cAAMP binds to CdnP at the GC site. The R site in GdpP is not sufficiently spacious to accommodate a nucleoside moiety. R, C and G sites correspond to CdnP.
